# Supplementary material
Source: PubMed Central journal article supplement (PMC1547732)

**A**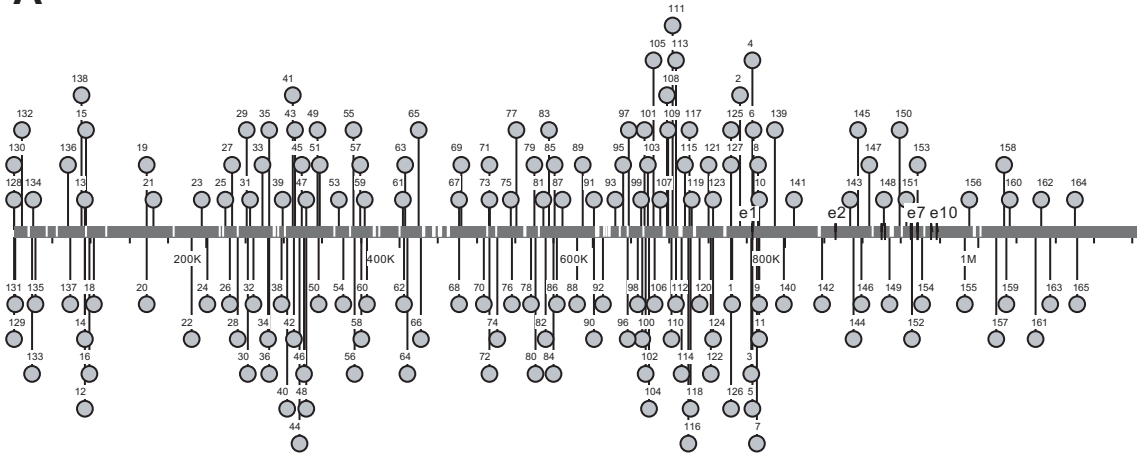**B**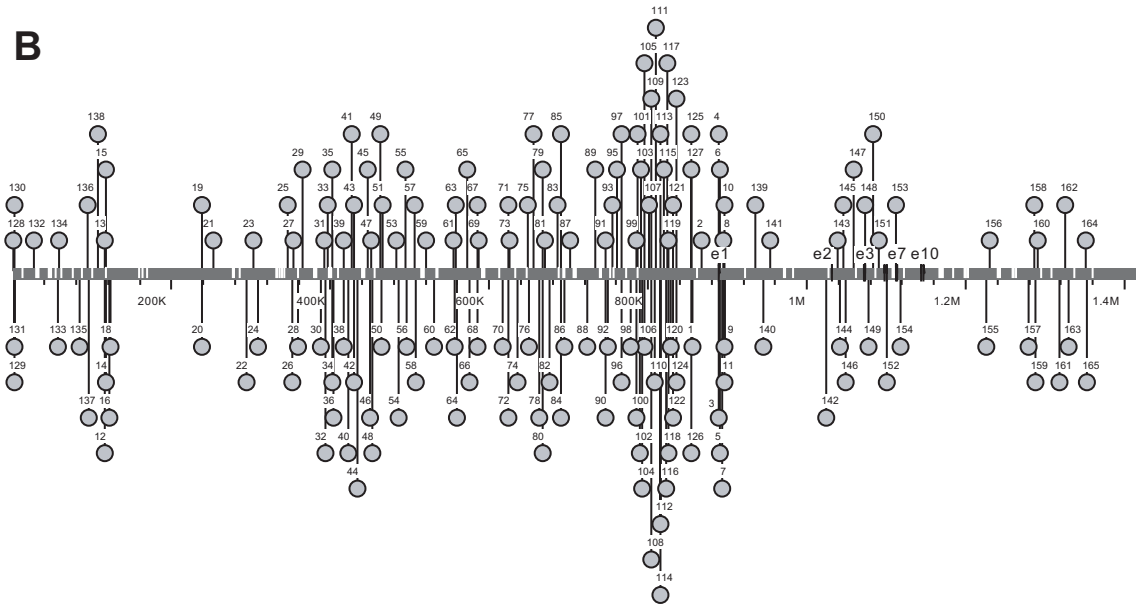

Supplement: NIHMS10970-supplement-Figure_S1.pdf [file NIHMS10970-supplement-Figure_S1.pdf]
